# Supplementary material for: Functional-metabolic coupling in distinct renal cell types coordinates organ-wide physiology and delays premature ageing
Source: PubMed Central journal article supplement (PMC10728150; doi:10.1038/s41467-023-44098-x), 2023-12-18
Supplement: 41467_2023_44098_MOESM3_ESM.pdf [file 41467_2023_44098_MOESM3_ESM.pdf]

## Description of Additional Supplementary Files

**Supplementary Movie 1:** Time-lapse live imaging of renal PC peroxisomes (labelled using SKL-GFP, green) dynamically interacting with lipid droplets (labelled using LipidTox, magenta) via putative pexapodia. Scale bars represent 0.3 $\mu$ m (left) and 4 $\mu$ m (right). Z-stacks were taken at regular 4 minute (left) or 5 minute (right) time intervals.

**Supplementary Movie 2:** 3D rendering of confocal image of a renal PC peroxisome (labelled using SKL-GFP, green) interacting with a lipid droplet (labelled using LipidTox, magenta) via putative pexapodia. Scale bar represents 1 $\mu$ m.
